# Supplementary material for: Risk factors for subtherapeutic levels of posaconazole tablet
Source: Oxford University Press journal article supplement (doi:10.1093/jac/dkx228), 2017-06-14
Supplement: dkx228_supplementary_data.docx [file dkx228_supplementary_data.docx]

**Supplementary data**

**Figure S1.** Patient enrolment and exclusion information.

Posaconazole level

≥ 700 ng/mL (n=128)

Posaconazole level

< 700 ng/mL (n=29)
